# Supplementary material for: A comprehensive comparison of RNA-Seq-based transcriptome analysis from reads to differential gene expression and cross-comparison with microarrays: a case study in Saccharomyces cerevisiae
Source: PubMed Central journal article supplement — Nucleic Acids Res. 2012 Sep 8;40(20):10084–97. doi: 10.1093/nar/gks804 (PMC3488244; doi:10.1093/nar/gks804), 2012-09-08
Supplement: supp_gks804_nar-01179-n-2012-File008.pdf [file supp_gks804_nar-01179-n-2012-File008.pdf]

# **Supplementary tables, figures and information for**

## **A comprehensive Comparisons of RNA-Seq based transcriptome analysis from reads to differential gene expression and cross comparison with microarrays**

Intawat Nookaew <sup>1,=</sup>, Marta Papini <sup>1,=</sup>, Natapol Pornputtpong <sup>1</sup>, Gionata Scalcinati <sup>1</sup>, Linn Fagerberg<sup>2</sup>, Matthias Uhlén <sup>2,3</sup>, Jens Nielsen <sup>1,3,\*</sup>

<sup>1</sup> Novo Nordisk Foundation Center for Biosustainability, Department of Chemical and Biological Engineering, Chalmers University of Technology, Gothenburg, Sweden.

<sup>2</sup> Novo Nordisk Foundation Center for Biosustainability, Department of Biotechnology, Royal Institute of Technology, Stockholm, Sweden

<sup>3</sup> Novo Nordisk Foundation Center for Biosustainability, Technical University of Denmark, DK-2970 Hørsholm, Denmark

= The authors equally contributed to this work

\* Corresponding Author: nielsenj@chalmers.se

**Table S1** Summary of RNA-seq data generated in this study

| Sample      | Number of paired reads (millions) | Number of nucleotides (GB) |
|-------------|-----------------------------------|----------------------------|
| Batch r1    | 5.73                              | 1.15                       |
| Batch r2    | 7.62                              | 1.52                       |
| Batch r3    | 5.57                              | 1.11                       |
| Chmostat r1 | 4.03                              | 0.81                       |
| Chmostat r2 | 6.75                              | 1.35                       |
| Chmostat r3 | 6.16                              | 1.23                       |
| All         | 35.85                             | 7.17                       |
| Average     | 5.97                              | 1.19                       |
| sd          | 1.21                              | 0.24                       |

**Table S2** Summary of genetic variations (SNV and INDEL) between *S. cerevisiae* CENPK 113-7D and reference strain S288c. The numbers show the genetic variation on specific region. The numbers in parenthesis represent the number of features containing at least one genetic variation in their ORF, upstream sequence, or probe.

| Region                 | SNV          | INDEL       |
|------------------------|--------------|-------------|
| In all chromosomes     | 28139        | 3520        |
| 1000 bp upstream       | 15494 (2469) | 2704 (1175) |
| Open reading frame ORF | 17139 (2269) | 702 (335)   |
| Microarray probe       | 2868 (2472)  | 151(119)    |

**Table S3** Mapping statistic of reads using the three aligners based on high quality reads. Bold italic numbers are % value. rm dup = remove potential PCR duplicate, non-rm dup = not remove potential PCR duplicate.

| Sample      | Number of paired reads (milions) | Number of high quality paired reads (milions) | % mapping to reference genome |                     |                     |                     |                     |                     |                     |                     |                     |
|-------------|----------------------------------|-----------------------------------------------|-------------------------------|---------------------|---------------------|---------------------|---------------------|---------------------|---------------------|---------------------|---------------------|
|             |                                  |                                               | Gsnap                         |                     |                     | Stampy              |                     |                     | TopHat              |                     |                     |
|             |                                  |                                               | non-rm dup                    | rm dup              | duplicate           | non-rm dup          | rm dup              | duplicate           | non-rm dup          | rm dup              | duplicate           |
| Batch r1    | 5.73                             | 5.64                                          | <b><i>98.07</i></b>           | <b><i>97.77</i></b> | <b><i>13.73</i></b> | <b><i>98.16</i></b> | <b><i>97.84</i></b> | <b><i>14.49</i></b> | <b><i>97.49</i></b> | <b><i>97.04</i></b> | <b><i>15.72</i></b> |
| Batch r2    | 7.62                             | 7.51                                          | <b><i>98.14</i></b>           | <b><i>97.85</i></b> | <b><i>13.32</i></b> | <b><i>98.40</i></b> | <b><i>98.09</i></b> | <b><i>16.49</i></b> | <b><i>99.79</i></b> | <b><i>99.75</i></b> | <b><i>17.26</i></b> |
| Batch r3    | 5.57                             | 5.48                                          | <b><i>98.25</i></b>           | <b><i>98.02</i></b> | <b><i>11.75</i></b> | <b><i>98.46</i></b> | <b><i>98.19</i></b> | <b><i>14.46</i></b> | <b><i>98.92</i></b> | <b><i>98.73</i></b> | <b><i>15.57</i></b> |
| Chmostat r1 | 4.03                             | 3.97                                          | <b><i>95.73</i></b>           | <b><i>95.44</i></b> | <b><i>6.44</i></b>  | <b><i>95.59</i></b> | <b><i>95.22</i></b> | <b><i>7.57</i></b>  | <b><i>95.66</i></b> | <b><i>95.23</i></b> | <b><i>9.51</i></b>  |
| Chmostat r2 | 6.75                             | 6.65                                          | <b><i>93.91</i></b>           | <b><i>92.66</i></b> | <b><i>17.14</i></b> | <b><i>93.40</i></b> | <b><i>91.67</i></b> | <b><i>20.81</i></b> | <b><i>93.25</i></b> | <b><i>92.40</i></b> | <b><i>11.98</i></b> |
| Chmostat r3 | 6.16                             | 6.06                                          | <b><i>96.43</i></b>           | <b><i>96.04</i></b> | <b><i>9.90</i></b>  | <b><i>96.61</i></b> | <b><i>96.18</i></b> | <b><i>11.34</i></b> | <b><i>98.75</i></b> | <b><i>98.57</i></b> | <b><i>12.81</i></b> |
| All average | 35.85                            | 35.30                                         | <b><i>34.17</i></b>           | <b><i>34.00</i></b> | <b><i>4.41</i></b>  | <b><i>34.17</i></b> | <b><i>33.96</i></b> | <b><i>5.22</i></b>  | <b><i>34.39</i></b> | <b><i>34.27</i></b> | <b><i>4.99</i></b>  |
| sd          | 5.97                             | 5.88                                          | <b><i>96.76</i></b>           | <b><i>96.29</i></b> | <b><i>12.05</i></b> | <b><i>96.77</i></b> | <b><i>96.20</i></b> | <b><i>14.19</i></b> | <b><i>97.31</i></b> | <b><i>96.95</i></b> | <b><i>13.81</i></b> |
|             | 1.21                             | 1.20                                          | <b><i>1.74</i></b>            | <b><i>2.08</i></b>  | <b><i>3.65</i></b>  | <b><i>2.01</i></b>  | <b><i>2.52</i></b>  | <b><i>4.50</i></b>  | <b><i>2.45</i></b>  | <b><i>2.73</i></b>  | <b><i>2.88</i></b>  |

**Table S4** Number of DGE (Q-values < 10e-5) from different methods (for microarray the number DGE is 1603)

| Method  | Gsnap | N.Gsnap | Stampy | N.Stampy | TopHat | N.TopHat | De novo |
|---------|-------|---------|--------|----------|--------|----------|---------|
| Cufdiff | 2061  | 2172    | 1712   | 1741     | 1671   | 1726     | 1623    |
| DESeq   | 2690  | 2731    | 2507   | 2503     | 2412   | 2432     | 2197    |
| edgeR   | 3087  | 3161    | 2732   | 2742     | 2649   | 2673     | 2385    |
| baySeq  | 1785  | 1807    | 1173   | 1198     | 1092   | 1133     | 1175    |
| NOISeq* | 2097  | 2070    | 1837   | 1784     | 1804   | 1754     | 1595    |

\* use cutoff by probability value > 0.875

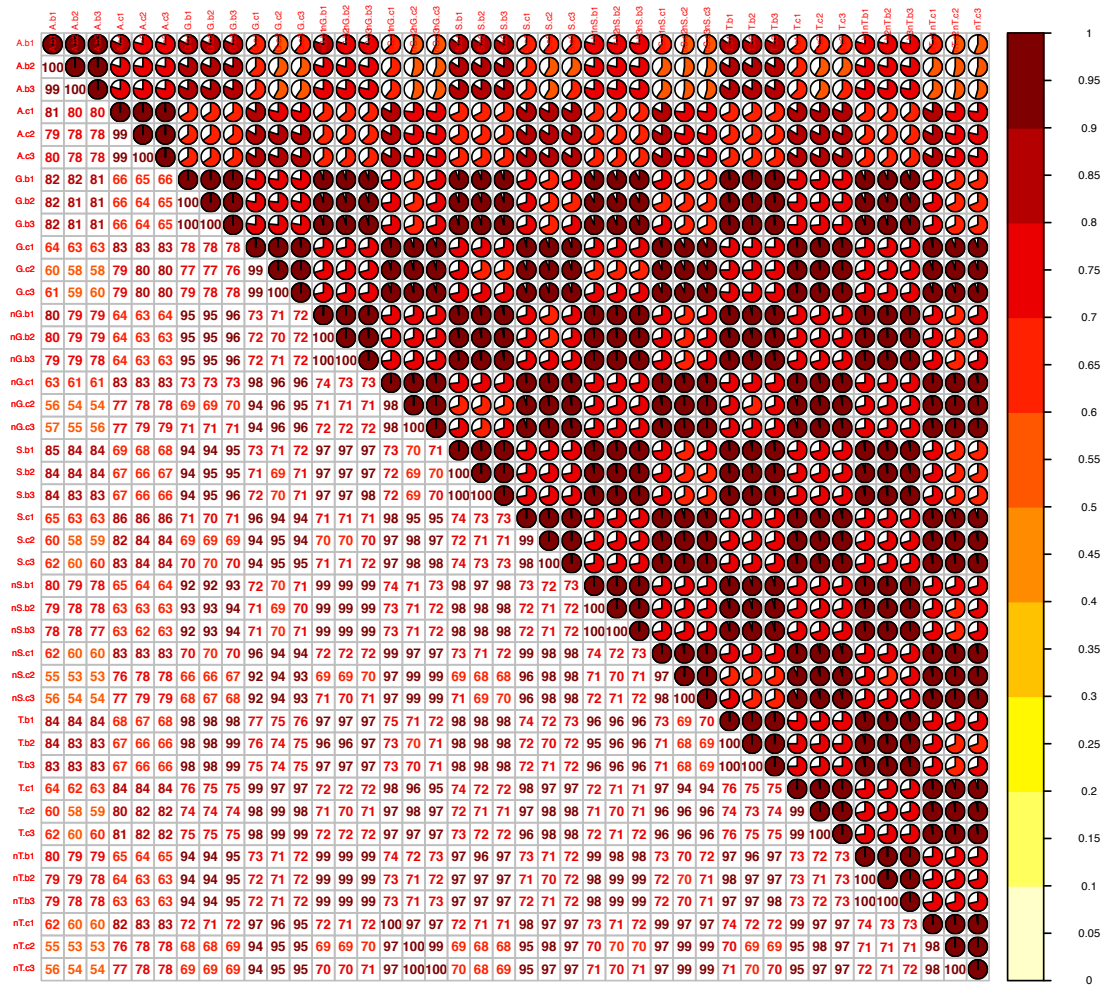

**Figure S1** Sample-wise correlation analysis. A = array, G = Gsnap, S = Stampy, T = TopHat. The non-removed potential PCR duplicates calculations indicate by “n.”

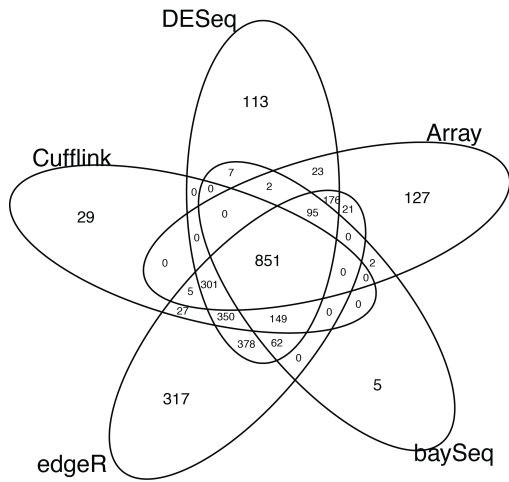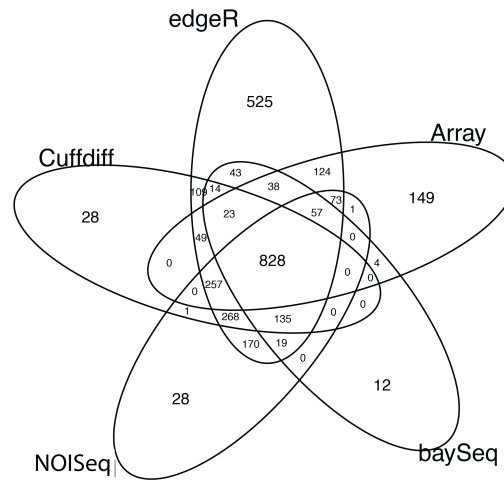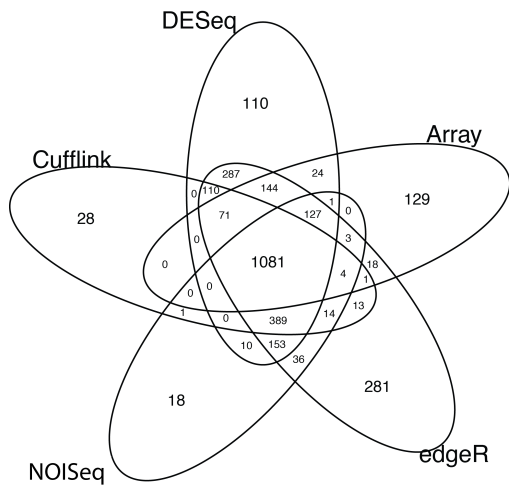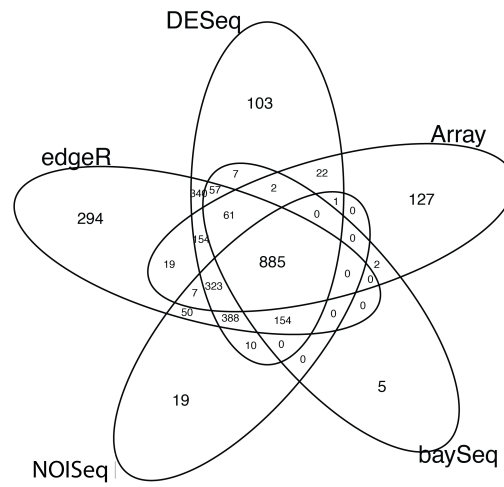

**Figure S2** Venn diagram comparison of DGE derived from different statistical analysis with the DGE results from microarray in similar way as Figure 3B

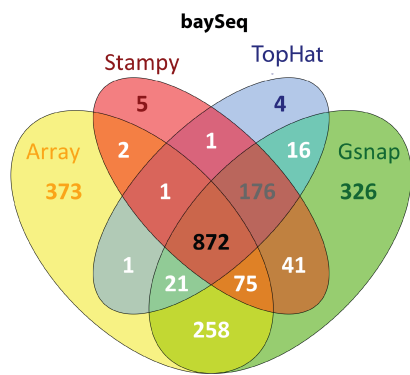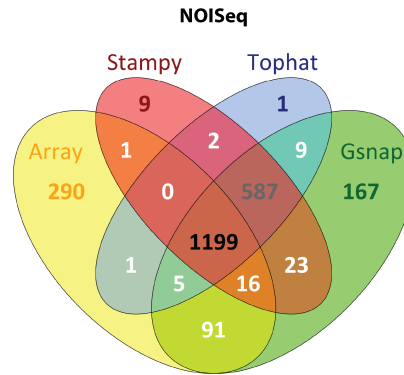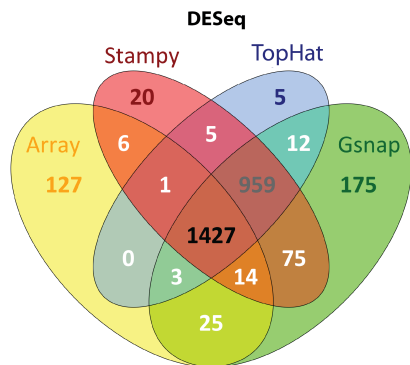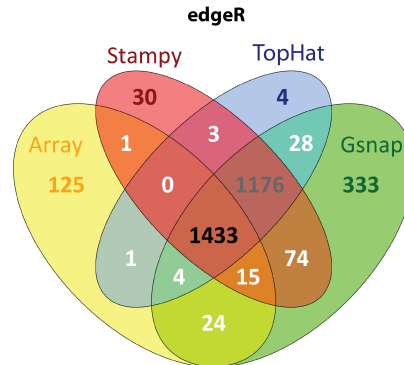

**Figure S3** Comparison of DGE using different statistical methods with DGE from microarray in similar way as Figure 3C

Bullard et al.

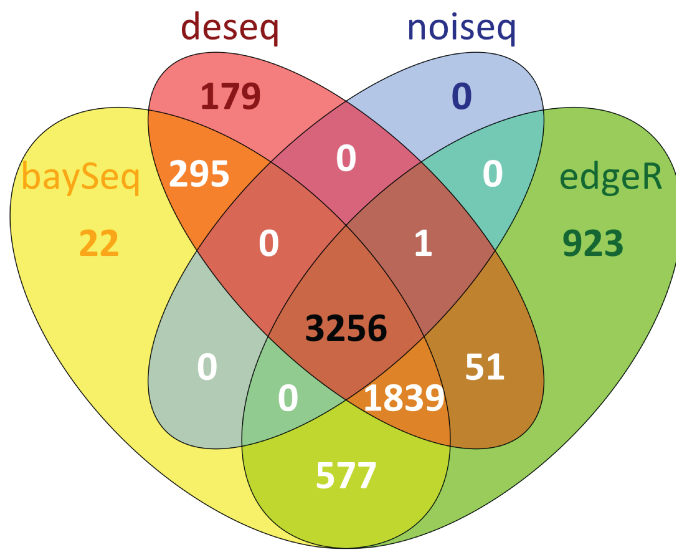

Marioni et al.

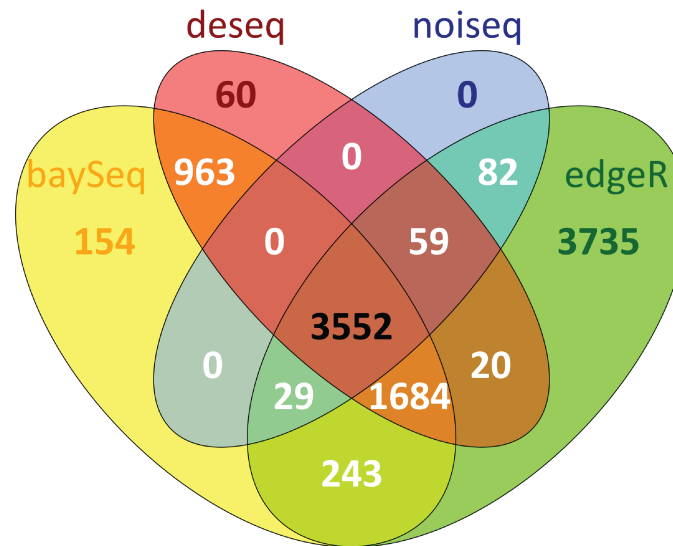

**Figure S4** Comparisons of DGE identification using edgeR, baySeq, DESeq and NOISeq methods. The read count table downloaded from 2 published mammalian data sets of Bullard et al ([BMC Bioinformatics](#), 2010 Feb 18;11:94) and Marioni et al. ([Genome Res.](#) 2008 Sep;18(9):1509-17.). The Venn's diagram were made with the cut-off  $Q < 1e-5$  and  $Pr > 0.875$ . Cuffdiff method was not included in the comparison because alignment results (SAM/BAM), which are required as input for Cuffdiff, are not provided with the articles.

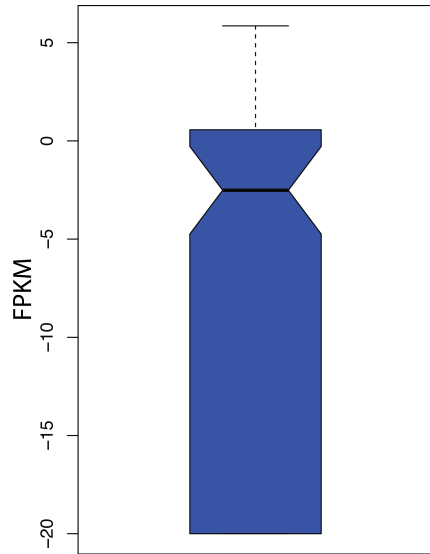

The 67 genes could not be captured by the *de novo* assembly approach

**Figure S5** Boxplot shows distribution of gene expression values (FPKM from reference mapping analysis from both batch and chemostat cultures) of the 67 genes could not be captured by the *de novo* assembly approach as full-length transcripts.



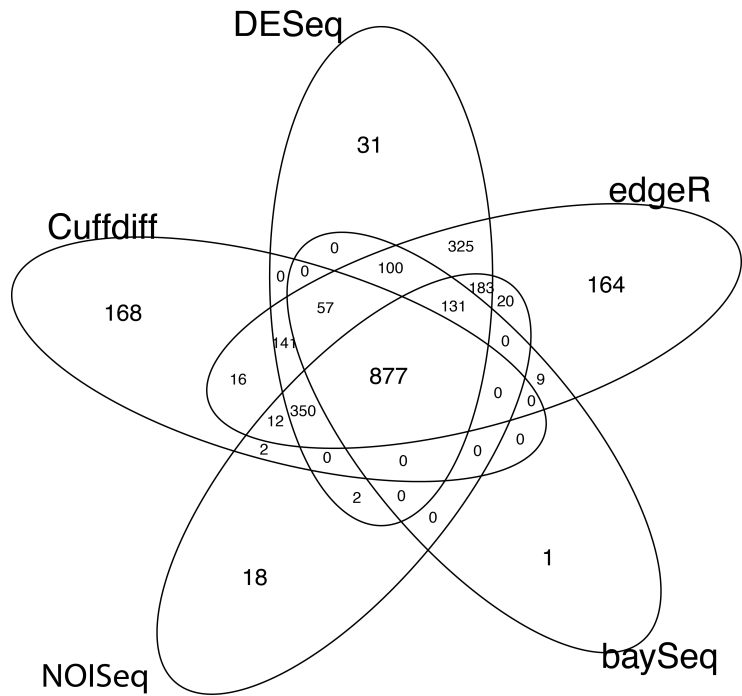

**Figure S6** Venn's diagram of the comparison of differential gene expression based on RNA-seq data (result from de novo assembly approach) through five different statistical methods: Cuffdiff, DESeq, NOISeq, edgeR and baySeq.

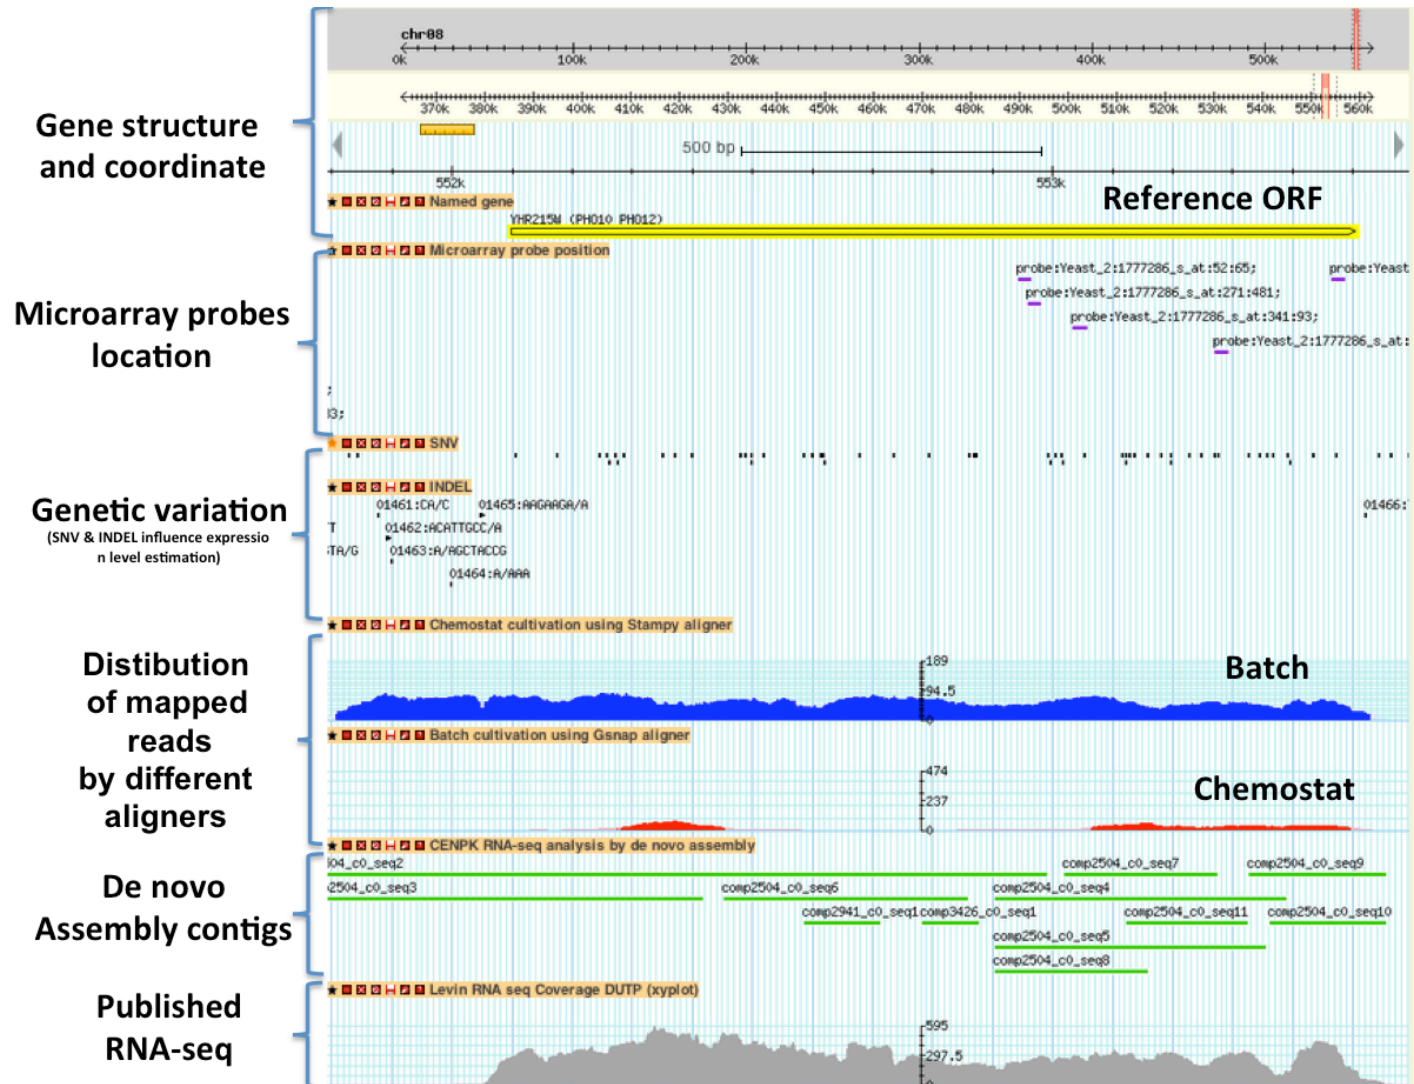

**Figure S7** Screen shot of the Yseq browser ([www.sysbio.se/Yseq](http://www.sysbio.se/Yseq))

## Supplementary information

### Alignment parameters

#### **Gsnap**

gsnap -d **databsename** -D **genomedatabase\_location** -A **sam** **fastq.1 fastq.2** > **outfile**

#### **Stampy**

stampy.py -f **sam** --solexa -o **outfile** -g **genomename** -h **genomehash** -M **fastq.1 fastq.2**

#### **TopHat**

tophat -o **outfile** **indexfile** **fastq.1 fastq.2**

### Calculate FPKM

cufflink -o **outfile** -G **gffile** -b **DNAfastafiles** **bamfile**

### Generate read count table by HTseq

htseq-count -m **intersection-strict** -s **no** -t **gene** -i **ID** **samfile** **gff\_file** > **outfile**

### Remove PCR duplicate

java -jar MarkDuplicates.jar I=**input** O=**output** REMOVE\_DUPLICATES=**true**

### De novo assembly

Trinity.pl --seqType fq --jaccard\_clip --kmer\_method inchworm --CPU 8 --output **outfile** --left **infile\_1** --right **infile\_2**

### Statistical analysis parameters

X = count table

#### **baySeq**

```
basyseq.test = function(x){  
  repl = c(rep(1,3),rep(2,3))
```

```

groups <- list(NDE = c(1,1,1,1,1,1), DE = c(1,1,1,2,2,2))
CD <- new("countData", data = as.matrix(x), replicates = repl, groups = groups)
CD@libsizes <- getLibsizes(CD)
CDP.NBML <- getPriors.NB(CD, samplesize = 1e6, estimation = "QL", cl = cl)
CDPost.NBML <- getLikelihoods.NB(CDP.NBML, pET = 'BIC', cl = cl)
return(CDPost.NBML)
}

```

### **DESeq**

```

deseq.test = function(x){
conds = c("b", "b", "b", "c", "c", "c")
cds<-newCountDataSet(x,conds)
cds<-estimateSizeFactors(cds)
sizeFactors(cds)
cds <- estimateDispersions (cds)
res <- nbinomTest (cds, "b", "c")
return(res)
}

```

### **edgeR**

```

edgeR.test = function(x){
group = c("b", "b", "b", "c", "c", "c")
dat = DGEList(counts=x,group=group)
design <- model.matrix(~factor(group))
dat <- estimateGLMTrandedDisp(dat,design)
dat <- estimateGLMTagwiseDisp(dat,design)
fit <- glmFit(dat,design)
stat.Glm <- glmLRT(dat,fit)
return(stat.Glm)
}

```

### **NOISeq**

```
noiseq.test = function(x) {  
  mydata <- vector("list", length = 2)  
  mynames <- rownames(x)  
  mydata[[1]] <- as.matrix(x[,1:3])  
  mydata[[2]] <- as.matrix(x[,4:6])  
  rownames(mydata[[1]]) <- rownames(mydata[[2]]) <- mynames  
  myresults <- noiseq(mydata[[1]], mydata[[2]], repl = "bio", k = 0.5, norm = "rpkm", long = mylength)  
}
```

### **Cuffdiff**

```
cuffdiff -o outfile gfffile -b DNAfastfiles b1.bam,b2.bam,b3.bam c1.bam,c2.bam, c3.bam
```

### **Software version**

FASTX ver. 0.0.13  
SolexaQA ver. 1.10  
ATLAS2 ver. 1.0  
Bowtie ver 0.12.7  
BEDTools ver. 2.14.3  
SAMTool ver 0.1.18  
Gsnap ver. 2012-01-11  
GMAP ver. 2012-01-11  
Stampy ver. 1.0.13  
TopHat ver. 1.4.1  
Cufflink/Cuffdiff ver 1.3.0  
HTseq ver. 0.5.3p3  
Trinity ver. R2012-01-25  
baySeq ver. 1.8.3  
DESeq ver. 1.6.1  
edgeR ver. 2.4.6  
NOISeq ver. 2011/04/9
